# Supplementary material for: The influence of patient-centeredness on patient safety perception among inpatients
Source: PLoS One. 2021 Feb 12;16(2):e0246928. doi: 10.1371/journal.pone.0246928 (PMC7880440; doi:10.1371/journal.pone.0246928)
Supplement: S2 Appendix — (XLSX) [file pone.0246928.s002.xlsx]

## Sheet: Sheet1
No	A	B	C1	C2	C3	C4	D	E	G	H	I	J	K	perception	A1	A2	A3	A4	B5	B6	B7	B8	C9	C10	C11	C12	C13	C14	D15	D16	E17	E17(reverse)	E18	E19	F20	F21	G22	G22(reverse)	H23	H24	I1	I2	I3	I4	I5	I6	I7	I8	I9
1	3.25	2.75	3.5	4	3	2	4	1.5	4	5	40	38	18	96	4	4	1	4	4	4	2	1	3	4	1	2	3	3	4	4	2	1	5	2	4	4	1	4	7	3	3	4	4	4	5	2	5	5	5
2	3.25	2.5	2	2.5	4	2.33333	1.5	2.5	4	5.5	38	32	12	82	4	4	1	4	4	4	1	1	3	1	1	4	4	2	1	2	2	1	5	4	2	3	1	4	8	3	4	4	4	4	5	1	5	5	5
3	3.75	2.75	3	2	4	2.33333	2.5	2	4	5.5	47	48	20	115	4	4	3	4	3	3	3	2	3	3	2	4	4	1	2	3	2	1	2	3	2	2	1	4	8	3	5	5	5	5	4	5	5	3	5
4	3.5	2.25	4	3.5	4	3	2.5	2	4	6	38	38	13	89	3	3	4	4	2	4	1	2	4	4	1	4	4	4	2	3	2	1	5	3	4	3	1	4	8	4	5	4	2	4	5	2	5	2	4
5	4	3.25	3.5	4	4	3.33333	3	2	3	5.5	47	49	20	116	4	4	4	4	3	3	4	3	3	4	4	3	4	3	3	3	2	1	5	3	4	4	2	3	8	3	4	4	4	5	5	5	5	5	5
6	3.75	3.75	4	4	4	2.66667	3.5	2.5	4	7	48	44	20	112	4	4	3	4	4	4	3	4	4	4	1	4	4	3	4	3	2	1	5	4	4	4	1	4	10	4	3	5	5	5	5	5	5	5	5
7	4	4	4	4	4	4	4	3	4	6	48	40	16	104	4	4	4	4	4	4	4	4	4	4	4	4	4	4	4	4	1	2	5	4	4	4	1	4	9	3	4	5	4	5	5	5	5	5	5
8	3.5	3.5	2.5	3.5	4	3.33333	3	2.66667	4	5.5	39	46	18	103	4	4	3	3	4	3	4	3	2	3	3	4	4	3	3	3	1	2	3	3	3	4	1	4	8	3	4	3	3	4	4	4	4	4	4
9	3.5	3.5	4	4	3	3.33333	3.5	2.5	4	6	44	48	13	105	4	3	3	4	4	4	4	2	4	4	3	4	3	3	4	3	1	2	5	3	4	4	1	4	8	4	4	4	3	5	5	5	5	4	4
10	4	3	4	4	4	4	4	3	4	6.5	49	43	20	112	4	4	4	4	4	4	1	3	4	4	4	4	4	4	4	4	1	2	5	4	4	4	1	4	9	4	4	5	5	5	5	5	5	5	5
11	4	3.5	4	4	4	3.66667	3	3	4	6.5	43	49	20	112	4	4	4	4	4	4	4	2	4	4	4	4	4	3	3	3	1	2	5	4	4	4	1	4	9	4	4	4	4	4	5	4	5	4	4
12	3.5	2.5	2.5	3	4	2.33333	4	2.5	4	6	34	36	18	88	4	4	3	3	3	3	1	3	2	3	2	3	4	2	4	4	2	1	5	4	3	3	1	4	9	3	3	3	3	5	3	3	5	2	3
13	3.25	3	3	4	3	3	3	2	4	5	40	36	12	88	4	3	3	3	3	2	4	3	3	3	2	3	3	4	3	3	2	1	2	3	4	4	1	4	7	3	4	3	4	4	3	4	5	5	4
14	3.5	3.5	2	4	3	3.33333	3	2	4	4.5	43	49	20	112	3	3	4	4	4	4	3	3	2	2	3	4	3	3	3	3	2	1	3	2	4	4	1	4	6	3	4	4	4	5	3	4	5	5	4
15	3.25	3	3.5	3	3	3	3	2	3	4.5	29	30	12	71	3	3	3	4	3	3	3	3	4	3	3	3	3	3	3	3	2	1	3	2	3	3	2	3	6	3	3	3	3	3	3	3	2	3	3
16	3	2.5	3	3	3	3	2	2.66667	3	5.5	27	28	12	67	3	3	3	3	3	3	1	3	3	3	3	3	3	3	3	1	1	2	3	3	3	3	2	3	8	3	3	3	3	3	2	2	3	3	3
17	3.5	3	3	4	3	3	3	3	3	5.5	40	43	16	99	4	4	3	3	3	3	3	3	3	3	3	3	3	3	3	3	1	2	3	4	4	4	2	3	8	3	4	4	4	4	4	4	4	4	4
18	3	2.75	2.5	1.5	3	3	1	2	4	4	37	38	16	91	3	3	3	3	3	3	3	2	2	3	3	3	3	3	1	1	2	1	5	3	2	1	1	4	6	2	4	4	2	4	3	3	4	5	4
19	4	3.5	4	4	4	4	3	2.33333	4	5.5	50	47	19	116	4	4	4	4	4	4	3	3	4	4	4	4	4	4	3	3	2	1	3	3	4	4	1	4	8	3	5	5	5	5	5	5	5	5	5
20	3.25	3.25	2.5	3.5	4	3	2.5	2.66667	3	5.5	41	37	16	94	3	3	4	3	4	3	3	3	2	3	2	3	4	4	3	2	1	2	3	3	4	3	2	3	8	3	4	4	5	4	4	3	4	5	4
21	4	3	2	4	4	2.66667	3.5	1	4	4.5	41	29	17	87	4	4	4	4	3	4	1	4	1	3	1	4	4	3	3	4	2	1	5	1	4	4	1	4	7	2	3	4	4	5	5	3	4	5	4
22	3.75	2	3.5	4	2	2.33333	3.5	1.66667	4	5.5	43	44	20	107	4	3	4	4	3	3	1	1	3	4	2	3	2	2	4	3	2	1	1	3	4	4	1	4	8	3	4	4	4	5	4	5	5	4	4
23	3	3	3	3	3	3	3	2.66667	3	5	40	39	16	95	3	3	3	3	3	3	3	3	3	3	3	3	3	3	3	3	1	2	3	3	3	3	2	3	7	3	4	4	4	4	4	4	4	4	4
24	3.5	4	3.5	4	3	4	4	2.5	1	7	40	47	18	105	3	4	3	4	4	4	4	4	3	4	4	4	3	4	4	4	1	2	5	3	4	4	4	1	10	4	5	5	5	5	5	5	5	3	1
25	4	3.25	3.5	4	4	3.33333	3	2.66667	2	5.5	47	49	20	116	4	4	4	4	4	3	3	3	3	4	3	4	4	3	3	3	1	2	3	3	4	4	3	2	8	3	5	5	5	4	5	4	4	5	5
26	4	4	3.5	4	4	3.66667	3	3	4	6	49	44	20	113	4	4	4	4	4	4	4	4	3	4	4	3	4	4	3	3	1	2	5	4	4	4	1	4	9	3	4	5	5	5	5	5	5	5	5
27	3.75	1.75	1	2.5	3	2.33333	3.5	1.66667	2	3	28	29	18	75	4	4	3	4	2	3	1	1	1	1	1	3	3	3	3	4	2	1	1	3	2	3	3	2	5	1	4	3	1	3	3	3	3	4	3
28	4	3.75	3	4	3	3.66667	3	2.5	4	7	43	43	20	106	4	4	4	4	4	4	3	4	3	3	3	4	3	4	3	3	2	1	5	4	4	4	1	4	10	4	4	4	5	4	4	4	4	5	4
29	3.25	2.75	2.5	3.5	4	3	3	2	4	6	38	31	17	86	3	3	3	4	3	3	2	3	3	2	3	3	4	3	3	3	2	1	2	3	3	4	1	4	8	4	4	4	4	4	4	4	4	3	4
30	4	3.25	3.5	3.5	4	3.66667	4	2.33333	4	5	38	23	16	77	4	4	4	4	4	4	2	3	3	4	3	4	4	4	4	4	2	1	2	4	4	3	1	4	7	3	4	3	4	2	4	4	5	4	4
31	4	4	4	4	4	4	3	3	4	5.5	50	50	20	120	4	4	4	4	4	4	4	4	4	4	4	4	4	4	4	2	1	2	3	4	4	4	1	4	8	3	5	5	5	5	5	5	5	5	5
32	3.5	3.25	4	2.5	3	2.66667	4	2	3	4.5	37	38	14	89	3	4	3	4	3	4	4	2	4	4	4	1	3	3	4	4	2	1	2	3	3	2	2	3	6	3	2	5	3	3	4	4	4	4	3
33	3.75	2.75	3	3.5	3	2	4	2.5	3	5.5	36	38	17	91	4	3	4	4	4	3	2	2	4	2	4	1	3	1	4	4	2	1	5	4	3	4	2	3	8	3	1	4	4	4	4	4	3	5	2
35	3.75	3.75	2.5	4	3	2	3	2	4	6.5	44	44	18	106	4	3	4	4	4	4	3	4	3	2	1	1	3	4	2	4	2	1	5	3	4	4	1	4	10	3	4	4	2	5	5	5	5	4	5
36	4	3.5	3	3	3	3.33333	4	2.66667	4	6.5	36	32	16	84	4	4	4	4	4	4	4	2	4	2	2	4	3	4	4	4	2	1	4	3	3	3	1	4	9	4	4	4	2	2	4	4	4	4	4
37	4	3.25	4	4	4	4	3	2.66667	4	6.5	47	45	20	112	4	4	4	4	4	4	2	3	4	4	4	4	4	4	4	2	2	1	3	4	4	4	1	4	9	4	4	4	4	5	5	5	5	5	5
38	4	3.5	4	4	4	4	3	3	4	5.5	46	48	16	110	4	4	4	4	4	4	3	3	4	4	4	4	4	4	3	3	2	1	4	4	4	4	1	4	8	3	4	4	4	5	5	5	5	5	4
39	2.75	3	3.5	3	4	3.33333	1	1.66667	4	1	33	44	15	92	3	3	2	3	4	3	2	3	3	4	3	4	4	3	1	1	2	1	1	3	4	2	1	4	1	1	4	3	4	3	3	3	5	3	2
40	3.25	3.5	2.5	4	3	3	3	1.66667	2	6	22	24	16	62	3	3	4	3	4	4	3	3	3	2	3	3	3	3	3	3	2	1	2	2	4	4	3	2	9	3	2	2	2	3	3	2	2	2	2
41	3.5	3.5	2	3.5	4	4	4	2.33333	4	6.5	47	36	20	103	4	3	3	4	4	4	3	3	3	1	4	4	4	4	4	4	2	1	2	4	3	4	1	4	9	4	4	5	5	5	5	5	4	5	5
42	4	4	4	4	4	4	4	2.5	4	7	49	49	20	118	4	4	4	4	4	4	4	4	4	4	4	4	4	4	4	4	2	1	5	4	4	4	1	4	10	4	5	5	5	5	5	5	5	4	5
43	4	4	4	4	4	4	3	3	4	6	47	47	20	114	4	4	4	4	4	4	4	4	4	4	4	4	4	4	3	3	2	1	4	4	4	4	1	4	9	3	4	4	4	5	5	5	5	5	5
44	3.5	3.75	3.5	4	4	4	4	2.66667	4	6	47	45	20	112	3	3	4	4	4	4	3	4	3	4	4	4	4	4	4	4	2	1	3	4	4	4	1	4	9	3	4	4	5	5	4	5	5	5	5
45	3.5	3.75	4	4	4	3.66667	3.5	2.66667	4	7	42	43	20	105	4	3	3	4	4	4	3	4	4	4	3	4	4	4	3	4	2	1	3	4	4	4	1	4	10	4	4	4	3	4	4	4	5	5	4
46	4	3.75	2.5	3	4	3.66667	3	2.33333	2	4	30	30	12	72	4	4	4	4	4	4	4	3	3	2	3	4	4	4	3	3	2	1	3	3	3	3	3	2	5	3	3	3	3	3	3	3	3	3	3
47	3.5	3.75	3.5	4	3	3.66667	3	2.66667	4	5.5	43	45	18	106	4	3	4	3	4	4	3	4	3	4	3	4	3	4	3	3	2	1	3	4	4	4	1	4	8	3	4	5	4	4	4	4	5	5	4
48	3.25	3.5	3	4	3	3.33333	3	2.66667	4	6	40	39	16	95	4	3	3	3	4	4	3	3	3	3	3	4	3	3	3	3	1	2	3	3	4	4	1	4	9	3	4	4	4	4	4	4	4	4	4
49	4	4	3.5	4	4	4	2	3	3	4.5	49	40	17	106	4	4	4	4	4	4	4	4	3	4	4	4	4	4	1	3	1	2	3	4	4	4	2	3	6	3	5	5	5	5	5	5	5	5	5
50	3.75	3	4	4	4	4	3	2.5	4	5.5	48	49	20	117	3	4	4	4	4	4	2	2	4	4	4	4	4	4	3	3	2	1	5	4	4	4	1	4	8	3	4	5	4	5	5	5	5	5	5
51	4	3.25	4	4	4	3.66667	4	2.5	1	5.5	50	50	20	120	4	4	4	4	4	4	3	2	4	4	4	4	4	3	4	4	2	1	5	4	4	4	4	1	8	3	5	5	5	5	5	5	5	5	5
52	3.75	3	2.5	4	4	3.33333	2	2	3	5	48	45	20	113	4	4	3	4	4	4	1	3	2	3	3	4	4	3	2	2	2	1	2	3	4	4	2	3	7	3	5	5	4	5	5	5	5	5	5
53	3.25	3.25	3.5	3.5	3	3.33333	3.5	2.33333	3	5	38	40	18	96	4	3	3	3	4	3	3	3	4	3	3	4	3	3	4	3	2	1	3	3	3	4	2	3	7	3	4	4	4	4	4	4	4	3	3
54	3	2.5	3	3	3	3	3	2.33333	3	4	29	30	12	71	3	3	3	3	3	3	2	2	3	3	3	3	3	3	3	3	2	1	3	3	3	3	2	3	5	3	3	3	3	3	3	3	3	2	3
55	4	3.5	4	4	4	4	4	3	1	6.5	42	37	19	98	4	4	4	4	4	4	3	3	4	4	4	4	4	4	4	4	2	1	4	4	4	4	4	1	9	4	4	4	3	4	4	4	4	5	5
56	3.25	3.25	3	3.5	3	3	3	2.33333	1	4.5	38	36	20	94	3	3	3	4	4	3	3	3	3	3	3	3	3	3	3	3	2	1	3	3	3	4	4	1	6	3	4	3	3	4	4	4	4	4	4
58	3.75	4	4	4	4	4	3	2.66667	4	5.5	40	40	16	96	3	4	4	4	4	4	4	4	4	4	4	4	4	4	3	3	1	2	2	4	4	4	1	4	8	3	4	4	4	4	4	4	4	4	4
59	3.75	3	3.5	4	4	3.33333	3	3	4	5.5	44	42	16	102	4	4	3	4	4	4	1	3	4	3	3	4	4	3	3	3	2	1	4	4	4	4	1	4	8	3	4	5	5	5	4	4	3	5	4
61	4	3.5	4	4	4	4	3	2.5	4	5.5	41	42	16	99	4	4	4	4	4	4	3	3	4	4	4	4	4	4	3	3	2	1	5	4	4	4	1	4	8	3	4	4	4	4	4	4	4	5	4
62	4	3	2.5	3.5	4	2.66667	4	2.33333	2	6	41	44	20	105	4	4	4	4	4	3	2	3	4	1	1	4	4	3	4	4	2	1	3	3	4	3	3	2	9	3	4	4	4	5	4	4	4	5	4
63	4	4	4	4	4	3.66667	3	3	3	6.5	47	44	18	109	4	4	4	4	4	4	4	4	4	4	4	4	4	3	3	3	1	2	3	4	4	4	2	3	9	4	4	5	5	5	5	5	5	5	4
65	3.75	3.75	4	4	4	3.66667	4	2.5	4	5.5	44	34	16	94	3	4	4	4	4	4	3	4	4	4	4	4	4	3	4	4	2	1	5	4	4	4	1	4	8	3	3	4	4	4	5	5	5	5	5
66	3.5	4	4	4	4	3.66667	4	2.5	4	5.5	46	50	20	116	4	3	3	4	4	4	4	4	4	4	3	4	4	4	4	4	2	1	5	4	4	4	1	4	8	3	5	5	4	4	5	4	4	5	5
67	4	3.25	4	4	4	4	4	2.5	4	7	50	50	20	120	4	4	4	4	4	4	2	3	4	4	4	4	4	4	4	4	2	1	5	4	4	4	1	4	10	4	5	5	5	5	5	5	5	5	5
68	3.25	2.75	3.5	4	4	2.66667	3	2.33333	4	5.5	41	40	16	97	3	3	3	4	3	3	2	3	4	3	2	4	4	2	3	3	2	1	3	3	4	4	1	4	8	3	4	4	4	4	4	3	4	5	4
69	2.75	2.75	3	2	3	2.33333	3	2.66667	3	5	33	32	13	78	4	3	2	2	3	3	3	2	3	3	3	1	3	3	3	3	2	1	3	4	3	1	2	3	7	3	3	3	3	3	4	3	4	3	3
70	3	2.75	2.5	2	3	1.33333	2	2	2	4	36	32	12	80	3	3	3	3	3	3	2	3	3	2	1	2	3	1	2	2	2	1	5	3	2	2	3	2	5	3	4	4	4	2	3	3	4	5	4
72	4	4	3.5	4	4	3.66667	4	3.33333	4	7	47	47	20	114	4	4	4	4	4	4	4	4	3	4	3	4	4	4	4	4	1	2	4	4	4	4	1	4	10	4	5	5	5	5	5	4	5	4	5
73	3.25	3	2	2.5	3	3	3	2.66667	3	5.5	30	34	14	78	4	3	3	3	4	3	3	2	2	2	3	3	3	3	3	3	1	2	3	3	3	2	2	3	8	3	3	3	3	3	3	3	3	3	3
74	4	3	4	3.5	4	3.66667	3	3	3	6	47	46	16	109	4	4	4	4	3	3	3	3	4	4	3	4	4	4	3	3	2	1	4	4	4	3	2	3	8	4	4	4	4	5	5	5	5	5	5
75	3	2.5	3.5	4	3	3.33333	3.5	3	4	5	45	42	20	107	3	3	3	3	3	3	2	2	3	4	3	4	3	3	3	4	1	2	3	4	4	4	1	4	7	3	4	5	4	5	5	4	5	5	4
76	3.75	4	4	4	4	4	4	2.66667	4	5.5	47	50	20	117	4	4	4	3	4	4	4	4	4	4	4	4	4	4	4	4	2	1	3	4	4	4	1	4	8	3	4	4	5	5	4	5	5	5	5
77	3.5	3.5	3	4	3	3	3	2.5	4	5.5	40	36	16	92	4	3	3	4	4	4	3	3	3	3	3	3	3	3	3	3	1	2	5	3	4	4	1	4	8	3	4	4	4	4	4	4	4	4	4
78	4	3.25	3	4	4	3.33333	3	2.5	4	6	40	46	20	106	4	4	4	4	4	4	2	3	4	2	2	4	4	4	4	2	2	1	5	4	4	4	1	4	9	3	4	4	4	4	3	4	5	4	4
79	3.5	4	4	4	4	4	4	2.66667	4	6	48	48	20	116	3	3	4	4	4	4	4	4	4	4	4	4	4	4	4	4	2	1	3	4	4	4	1	4	9	3	4	4	5	5	5	5	5	5	5
80	3	3	3	2.5	3	3	3	2	4	4	30	29	12	71	3	3	3	3	3	3	3	3	3	3	3	3	3	3	3	3	2	1	5	3	2	3	1	4	5	3	3	3	3	3	3	3	3	3	3
81	3	3.75	4	4	4	3.66667	3.5	2	4	6	47	44	20	111	3	3	3	3	4	4	4	3	4	4	3	4	4	4	4	3	2	1	5	3	4	4	1	4	9	3	4	4	4	5	5	5	5	5	5
82	4	3.5	4	3	4	4	2	1.33333	4	5	43	48	20	111	4	4	4	4	4	4	4	2	4	4	4	4	4	4	2	2	2	1	2	1	3	3	1	4	7	3	4	4	4	4	4	4	4	5	5
83	4	3.25	4	3	4	4	1.5	2.33333	4	4	30	30	12	72	4	4	4	4	4	4	3	2	4	4	4	4	4	4	1	2	1	2	3	2	2	4	1	4	5	3	3	3	3	3	3	3	3	3	3
86	4	3.5	4	4	4	3.66667	2	2.5	1	6.5	50	50	20	120	4	4	4	4	4	3	4	3	4	4	3	4	4	4	1	3	2	1	5	4	4	4	4	1	10	3	5	5	5	5	5	5	5	5	5
87	4	4	4	3	4	4	4	2.66667	4	6	40	39	16	95	4	4	4	4	4	4	4	4	4	4	4	4	4	4	4	4	1	2	3	3	3	3	1	4	9	3	4	4	4	4	4	4	4	4	4
88	4	4	3.5	4	4	4	2.5	1	4	6.5	50	45	17	112	4	4	4	4	4	4	4	4	3	4	4	4	4	4	2	3	2	1	1	1	4	4	1	4	9	4	5	5	5	5	5	5	5	5	5
90	3	2.5	2	2.5	3	2.33333	2.5	2.66667	3	5.5	41	39	16	96	3	3	3	3	3	3	2	2	2	2	2	2	3	3	2	3	2	1	3	4	3	2	2	3	8	3	4	4	4	4	5	4	4	4	4
91	3.25	2.75	3.5	3.5	3	3	3.5	2.66667	3	4	35	41	16	92	3	3	4	3	3	2	3	3	4	3	3	3	3	3	4	3	1	2	3	3	4	3	2	3	5	3	3	4	2	3	4	4	4	4	3
92	3.75	3.5	4	3.5	4	3.66667	2.5	2.5	4	5.5	46	38	19	103	4	4	3	4	4	3	4	3	4	4	4	4	4	3	2	3	2	1	5	4	3	4	1	4	8	3	5	5	5	4	4	4	5	5	4
93	3.25	3.5	3	3.5	2	3	3	2.33333	3	5.5	37	40	16	93	3	4	3	3	4	3	3	4	3	3	3	3	2	3	3	3	1	2	2	3	4	3	2	3	8	3	4	4	4	4	4	3	3	4	3
94	3.75	3.25	3.5	4	4	3.66667	2.5	2.66667	4	5	13	11	4	28	4	3	4	4	4	4	2	3	4	3	4	4	4	3	2	3	2	1	3	4	4	4	1	4	7	3	1	1	2	2	1	1	2	1	1
95	3.75	3.5	3	4	4	3.33333	3	2	3	5	46	43	19	108	4	4	4	3	3	4	4	3	3	3	3	4	4	3	3	3	2	1	2	3	4	4	2	3	7	3	4	4	4	5	5	4	5	5	5
96	4	3.5	3	4	4	4	3.5	2.33333	4	5.5	50	47	20	117	4	4	4	4	4	4	3	3	3	3	4	4	4	4	4	3	2	1	2	4	4	4	1	4	8	3	5	5	5	5	5	5	5	5	5
97	3	3	2.5	3	3	3	4	2.5	4	5.5	38	38	15	91	3	3	3	3	3	3	3	3	3	2	3	3	3	3	4	4	2	1	5	4	3	3	1	4	8	3	4	4	4	4	3	3	4	4	4
98	4	2.75	3	4	4	3.66667	3	2.5	4	6	46	39	20	105	4	4	4	4	3	3	2	3	3	3	3	4	4	4	3	3	2	1	5	4	4	4	1	4	9	3	4	4	4	5	5	4	5	5	5
99	3.75	2.5	4	4	4	3.33333	4	2.66667	3	5.5	34	42	19	95	4	4	3	4	3	2	3	2	4	4	4	4	4	2	4	4	2	1	3	4	4	4	2	3	8	3	4	4	3	4	2	4	4	3	4
100	3	3.5	4	4	3	4	3	1.5	3	4.5	35	44	20	99	3	3	3	3	3	3	4	4	4	4	4	4	3	4	3	3	2	1	5	2	4	4	2	3	7	2	4	3	3	3	3	3	4	4	4
101	3.5	3	4	4	4	3.66667	3	2.33333	4	5.5	45	46	20	111	4	3	3	4	4	3	3	2	4	4	4	4	4	3	3	3	2	1	3	3	4	4	1	4	8	3	4	4	4	4	4	5	5	5	5
103	3.5	2.75	2.5	2.5	4	3	3.5	2.66667	3	5.5	32	32	14	78	4	3	3	4	3	3	2	3	4	1	3	3	4	3	4	3	1	2	3	3	2	3	2	3	8	3	3	3	3	4	4	3	4	3	2
104	4	4	4	4	4	4	3	2.66667	4	5.5	46	50	20	116	4	4	4	4	4	4	4	4	4	4	4	4	4	4	3	3	2	1	3	4	4	4	1	4	8	3	4	4	4	5	5	5	5	4	5
105	2.5	2.25	2	2.5	2	1.66667	2.5	1.66667	3	3	26	31	9	66	3	3	2	2	3	2	2	2	2	2	2	1	2	2	3	2	2	1	2	2	2	3	2	3	4	2	2	2	3	3	2	3	3	2	3
106	4	3	4	3	4	4	3	3	4	6	50	47	20	117	4	4	4	4	3	3	3	3	4	4	4	4	4	4	3	3	1	2	5	4	3	3	1	4	9	3	5	5	5	5	5	5	5	5	5
107	3.5	3.25	4	3.5	4	3.66667	3	2.5	4	5.5	46	47	20	113	4	4	3	3	4	4	2	3	4	4	4	3	4	4	3	3	2	1	5	4	3	4	1	4	8	3	4	4	4	4	5	5	5	5	5
108	3.5	3	2.5	3.5	2	2.66667	2	2.33333	3	3	37	38	16	91	4	4	3	3	4	3	2	3	3	2	3	3	2	2	2	2	2	1	3	3	3	4	2	3	4	2	4	4	3	3	3	4	4	4	4
109	4	4	3.5	4	4	4	4	2.5	4	6.5	48	43	20	111	4	4	4	4	4	4	4	4	4	3	4	4	4	4	4	4	2	1	5	4	4	4	1	4	10	3	4	4	5	5	5	5	5	5	5
110	3.75	4	4	3	4	4	4	2.66667	2	5	42	44	20	106	3	4	4	4	4	4	4	4	4	4	4	4	4	4	4	4	2	1	3	4	3	3	3	2	7	3	4	4	4	4	4	4	5	5	4
111	4	4	3.5	3	4	3.66667	2.5	2.5	4	5	46	48	20	114	4	4	4	4	4	4	4	4	3	4	4	3	4	4	3	2	2	1	5	4	3	3	1	4	7	3	5	5	5	5	5	5	4	2	5
112	3.25	3	3	4	3	3.66667	3	2.66667	3	5	50	50	20	120	4	3	3	3	3	3	3	3	3	3	3	4	3	4	3	3	2	1	3	4	4	4	2	3	7	3	5	5	5	5	5	5	5	5	5
113	3	3.5	1.5	2	3	3	3.5	2.33333	3	5.5	40	36	16	92	3	3	3	3	4	4	3	3	2	1	3	3	3	3	4	3	2	1	3	3	2	2	2	3	8	3	4	4	4	4	4	3	4	5	4
114	4	3.5	3.5	3.5	4	3.33333	3	2.5	4	7	45	40	16	101	4	4	4	4	4	4	3	3	4	3	3	4	4	3	3	3	2	1	5	4	4	3	1	4	10	4	5	5	3	5	5	5	5	4	4
115	3.75	4	4	4	4	3.66667	3	2.5	4	5.5	41	40	17	98	4	4	3	4	4	4	4	4	4	4	4	4	4	3	3	3	2	1	5	4	4	4	1	4	8	3	4	4	4	4	5	4	5	3	5
116	3.25	2.75	2.5	2.5	3	2.33333	2	1.33333	4	3.5	31	36	16	83	4	3	3	3	3	3	3	2	3	2	2	3	3	2	2	2	2	1	1	2	3	2	1	4	5	2	3	3	3	3	4	3	3	2	3
117	3.25	3.75	3.5	3.5	4	4	3.5	2	2	6	44	37	19	100	4	1	4	4	4	4	3	4	4	3	4	4	4	4	4	3	2	1	2	3	3	4	3	2	9	3	4	4	5	5	5	4	4	4	4
118	3.5	3.25	3	4	3	3	3	2.66667	4	5	40	34	14	88	3	3	4	4	4	3	3	3	3	3	3	3	3	3	3	3	2	1	3	4	4	4	1	4	7	3	4	4	4	4	4	4	4	4	4
119	3.25	3.25	2.5	4	3	3.66667	4	3	4	6.5	47	41	20	108	4	3	3	3	4	4	1	4	3	2	3	4	3	4	4	4	1	2	5	4	4	4	1	4	9	4	5	4	4	5	5	5	5	5	5
120	4	3.5	4	3	4	4	4	2.5	4	5.5	41	43	20	104	4	4	4	4	4	4	3	3	4	4	4	4	4	4	4	4	2	1	5	4	3	3	1	4	8	3	4	4	2	4	5	5	4	4	4
121	3.5	2.75	2	2.5	3	2.66667	1	1.33333	3	3.5	32	27	13	72	4	3	3	4	3	3	3	2	2	2	3	3	3	2	1	1	2	1	1	2	3	2	2	3	5	2	3	4	4	3	2	3	4	4	3
122	3.75	3.5	3.5	3	4	3.33333	2.5	2	4	5	43	31	17	91	4	4	3	4	4	4	3	3	3	4	3	4	4	3	3	2	2	1	5	3	3	3	1	4	7	3	4	4	4	4	5	4	4	5	5
123	3.75	3.75	4	4	4	3.66667	4	3	4	6	46	44	20	110	4	4	3	4	4	3	4	4	4	4	4	4	4	3	4	4	2	1	4	4	4	4	1	4	9	3	4	4	5	5	5	4	5	5	4
124	4	3.25	4	4	4	3.33333	4	3	4	5.5	49	48	20	117	4	4	4	4	4	4	1	4	4	4	3	3	4	4	4	4	1	2	5	4	4	4	1	4	8	3	5	5	5	5	5	5	4	5	5
125	3	3.25	2.5	4	3	3	3	3	4	6	40	35	16	91	3	3	3	3	3	3	3	4	3	2	3	3	3	3	3	3	1	2	4	3	4	4	1	4	9	3	4	4	4	4	4	4	4	4	4
126	3.75	3.75	4	4	4	2.66667	3	2.5	4	6.5	50	43	20	113	3	4	4	4	3	4	4	4	4	4	4	3	4	1	3	3	2	1	5	4	4	4	1	4	10	3	5	5	5	5	5	5	5	5	5
127	4	4	4	4	4	4	3.5	2.5	4	6	50	49	20	119	4	4	4	4	4	4	4	4	4	4	4	4	4	4	4	3	2	1	5	4	4	4	1	4	9	3	5	5	5	5	5	5	5	5	5
128	2.5	2.75	1	4	4	1.66667	1.5	1	4	2.5	27	35	10	72	3	3	1	3	3	3	3	2	1	1	1	3	4	1	1	2	2	1	1	1	4	4	1	4	3	2	2	2	1	4	3	3	4	4	3
129	4	4	4	3.5	4	3.66667	3.5	2.66667	4	6.5	40	39	16	95	4	4	4	4	4	4	4	4	4	4	4	4	4	3	4	3	2	1	3	4	3	4	1	4	9	4	4	4	4	4	4	4	4	4	4
130	3.5	3.75	4	4	4	4	4	2	4	5	50	50	20	120	4	3	4	3	4	4	3	4	4	4	4	4	4	4	4	4	2	1	1	4	4	4	1	4	7	3	5	5	5	5	5	5	5	5	5
131	3	2.5	2	3	3	3	2.5	2	3	4.5	37	38	16	91	3	3	3	3	3	3	2	2	2	2	3	3	3	3	2	3	2	1	2	3	3	3	2	3	6	3	3	4	3	4	4	3	4	4	4
[truncated: 33 more columns]
